# Supplementary material for: Denitrogenation and desulfurization of model oil through adsorption process using one-pot-synthesized reusable CYCU-3@Al2O3 composites
Source: Royal Society of Chemistry journal article supplement (doi:10.1039/d3nj03072e), 2023-01-01
Supplement: d3nj03072e1.pdf [file d3nj03072e1.pdf]

## Denitrogenation and desulfurization of model oil through adsorption process using one-pot synthesized reusable CYCU-3@Al<sub>2</sub>O<sub>3</sub> composites

Hongchen Fu, Zareen Zuhra, Shafqat Ali, Yunshan Zhou\*, Lijuan Zhang\*, Xiaoya Duan, Zipeng Zhao  
State Key Laboratory of Chemical Resource Engineering, College of Chemistry, Beijing University of  
Chemical Technology, Beijing, 100029, P. R. China. zhouys@mail.buct.edu.cn (Y. Zhou),  
ljzhang@mail.buct.edu.cn (L. Zhang)

### Apparatus

FT-IR analyses were examined on a MAGNA-IR 750 (Nicolet) spectrophotometer by using a KBr pellet and wavenumber was adjusted from 400 to 4000 cm<sup>-1</sup>. The powder X-ray diffractions of the composites were measured by using a Shimadzu D-6000 X-ray diffractometer along with Cu-K $\alpha$  irradiation ( $\lambda = 1.5418 \text{ \AA}$ ) as a source. The SEM and EDX measurement were conducted with a Zeiss Supra 55 scanning electron microscopy and energy dispersive X-ray spectroscopy, respectively. For the SEM images of Al<sub>2</sub>O<sub>3</sub> and the CYCU-3@Al<sub>2</sub>O<sub>3</sub> composites, they beads were cut into two pieces, and the SEM image were taken from the cross section. The ICP elemental analysis was analyzed by the Spectro Arcosepo of the German Spike analysis instruments. The BET analyses were collected on an ASAP-2020 (Micrometrics USA) equipment at 77 K and nitrogen atmosphere. The specific surface area (SBET) was measured from the linear isotherm part of the BET equation ( $P/P_0 = 0.05-0.3$ ). The distribution in pore size was derived from the desorption branch of the N<sub>2</sub> isotherm through a combination of Dubinin-Radushkevich (DR) method (0.35 – 10 nm pore size distribution analysis) and Barrett-Joyner-Halenda (BJH) method (10 – 70 nm pore size distribution analysis). TG/DTA analysis was made on a Netzsch STA449 with a temperature rate of 10 °C min<sup>-1</sup> in the temperature range of 25 to 800 °C under air flow. HR-TEM images were obtained by JEOL JEM 2100 with the acceleration voltage of 200 kV. The sulfur and nitrogen content was studied by Agilent 1100 Series HPLC with following specifications: column of C-18 with 4.6 mm in diameter and 150 mm in length and filter of 5  $\mu\text{m}$  in diameter, 30°C of column temperature. The initial mobile phase was composed of 90% methanol and 10% water while the gradient elution was done by using a 100% methanol for 10 min with its flow rate of 1.0 mL/min.

### Synthesis of CYCU-3@Al<sub>2</sub>O<sub>3</sub> composites

In fact, we synthesized a series of CYCU-3@Al<sub>2</sub>O<sub>3</sub> with different mass ratio of added H<sub>2</sub>SDC to  $\gamma$ -Al<sub>2</sub>O<sub>3</sub> in the synthesis process of our experiments (the 5%, 10% and 20% meant the mass ratio of added H<sub>2</sub>SDC to  $\gamma$ -Al<sub>2</sub>O<sub>3</sub> in the synthesis), including CYCU-3@Al<sub>2</sub>O<sub>3</sub> (30%) and CYCU-3@Al<sub>2</sub>O<sub>3</sub> (40%). By measuring the loading amount of MOF on Al<sub>2</sub>O<sub>3</sub> through elemental analysis, we found that when it was greater than 20%, the loading amount of CYCU-3 on the carrier remained almost unchanged (The elemental analysis date is as follows), meantime more CYCU-3 powders also formed in the reaction solution, which is not good in economic view. Considering the reasons of saving economy, our experiment ultimately chose three proportions: 5%, 10%, and 20%.

Table S1 The elemental analysis of CYCU-3@ Al<sub>2</sub>O<sub>3</sub>(5、10、20、30 and 40%)

| Name                                        | N(%) | C(%) | H(%) | S(%) |
|---------------------------------------------|------|------|------|------|
| CYCU-3@Al <sub>2</sub> O <sub>3</sub> (5%)  | 0.31 | 5.09 | 0.85 | 0.06 |
| CYCU-3@Al <sub>2</sub> O <sub>3</sub> (10%) | 0.37 | 5.86 | 0.91 | 0.05 |
| CYCU-3@Al <sub>2</sub> O <sub>3</sub> (20%) | 0.32 | 7.88 | 1.02 | 0.04 |
| CYCU-3@Al <sub>2</sub> O <sub>3</sub> (30%) | 0.34 | 7.93 | 1.02 | 0.05 |
| CYCU-3@Al <sub>2</sub> O <sub>3</sub> (40%) | 0.36 | 7.98 | 1.04 | 0.04 |

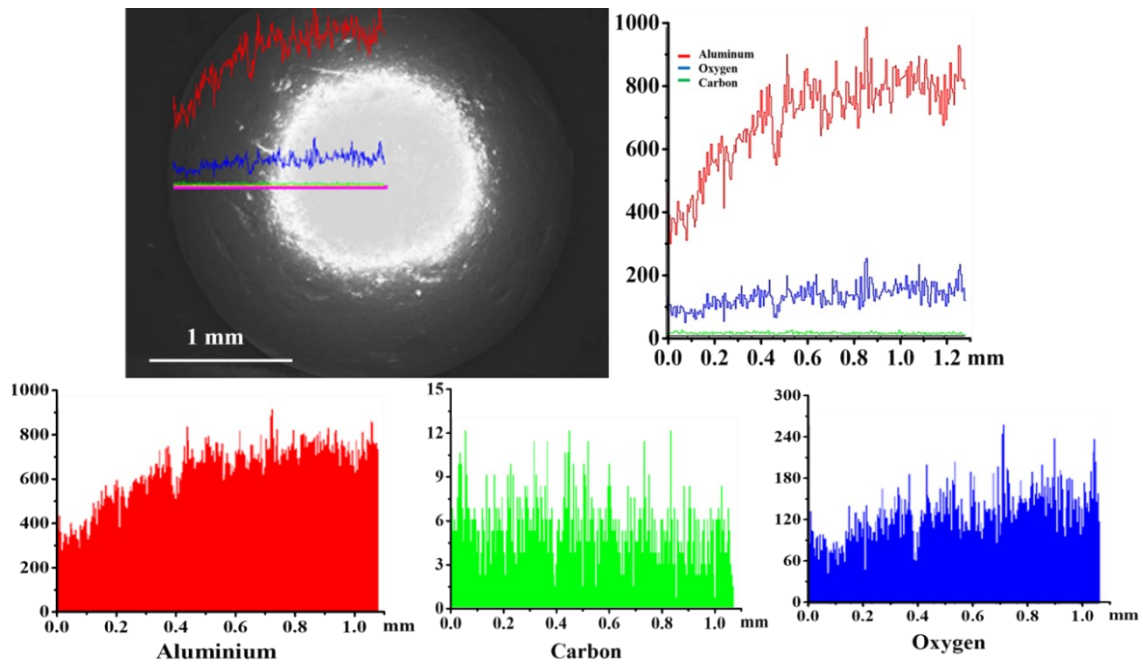

Fig. S1 Elemental lining of the cross-section of CYCU-3@Al<sub>2</sub>O<sub>3</sub>(20%) composite bead.

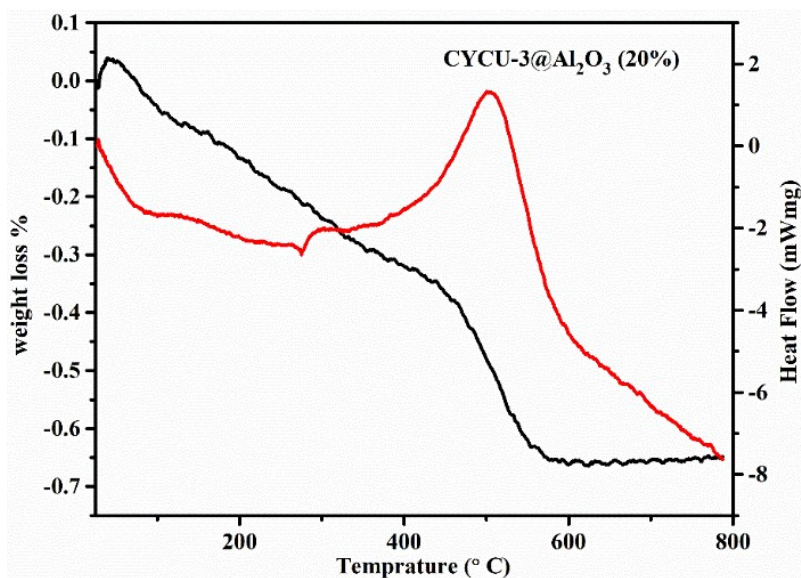

Fig. S2 TGA-DTA curves of the CYCU-3@Al<sub>2</sub>O<sub>3</sub>(20%) composite.

Table S2 BET surface area and pore size of CYCU-3@Al<sub>2</sub>O<sub>3</sub> (5、 10 and 20%) composites

|                                             | BET surface area<br>(m <sup>2</sup> /g) | DR method<br>(0.35 – 10 nm) | BJH method<br>(10 – 70 nm) |
|---------------------------------------------|-----------------------------------------|-----------------------------|----------------------------|
| CYCU-3@Al <sub>2</sub> O <sub>3</sub> (5%)  | 585                                     | 1.79                        | 11.78                      |
| CYCU-3@Al <sub>2</sub> O <sub>3</sub> (10%) | 685                                     | 1.81                        | 12.53                      |
| CYCU-3@Al <sub>2</sub> O <sub>3</sub> (20%) | 840                                     | 1.85                        | 16.57                      |

Table S3 The maximum adsorptive desulfurization capacities of DBT comparison between present work and some reported work.

| Adsorbent                                        | Q <sub>max</sub><br>(mg S/g MOF) | Simulated oil           | C <sub>0</sub> (ppmw <sub>S</sub> )<br>(System) |
|--------------------------------------------------|----------------------------------|-------------------------|-------------------------------------------------|
| Zn <sub>4</sub> O(BDC) <sub>3</sub> <sup>1</sup> | 12.7                             | iso-octane              | 300/fixed bed                                   |
| Zn <sub>4</sub> O(BDC) <sub>3</sub> <sup>1</sup> | 9.1                              | iso-oct:toluene(85:15)  | 300/fixed bed                                   |
| MOF-505 <sup>1</sup>                             | 20.5                             | iso-octane              | 300/fixed bed                                   |
| MOF-505 <sup>1</sup>                             | 14.9                             | iso-oct:toluene (85:15) | 300/fixed bed                                   |

|                                                                 |                   |                                       |               |
|-----------------------------------------------------------------|-------------------|---------------------------------------|---------------|
| UMCM-150 <sup>1</sup>                                           | 66.3              | iso-octane                            | 300/fixed bed |
| UMCM-150 <sup>1</sup>                                           | 66.6              | iso-oct:toluene (85:15)               | 300/fixed bed |
| MIL-101 <sup>2</sup>                                            | 28.9              | <i>n</i> -octane                      | ~714/batch    |
| ZIF-8-derived porous carbon <sup>3</sup>                        | 26.7              | <i>n</i> -hexane                      | <160/batch    |
| ZIF-8-derived porous carbon <sup>3</sup>                        | 22.2              | <i>n</i> -hexane:para-xylene<br>(9:1) | <174/batch    |
| Cr-BDC <sup>4</sup>                                             | 41.0              | <i>n</i> -octane                      | 1000/batch    |
| Cr-BTC <sup>4</sup>                                             | 30.7 This work    | <i>n</i> -octane                      | 1000/batch    |
| Activated Al <sub>2</sub> O <sub>3</sub> <sup>5</sup>           | 21.0              | <i>n</i> -hexane                      | <174/batch    |
| CMK-3 <sup>6</sup>                                              | 10.9              | <i>n</i> -hexane                      | <261/batch    |
| CMK-5 <sup>6</sup>                                              | 21.7              | <i>n</i> -hexane                      | <261/batch    |
| Carbon aerogel <sup>7</sup>                                     | 15.1              | <i>n</i> -hexadecane                  | <696/batch    |
| Activated carbon <sup>8</sup>                                   | 28.9              | <i>n</i> -octane                      | 300/batch     |
| Activated carbon spheres <sup>9</sup>                           | 17.6              | <i>n</i> -octane                      | <124/batch    |
| Cu(I)-Y zeolite <sup>10</sup>                                   | 32.6              | <i>n</i> -octane                      | ~690/batch    |
| Co-Y zeolite <sup>10</sup>                                      | 29.4              | <i>n</i> -octane                      | ~690/batch    |
| Ce/Ni-Y zeolite <sup>11</sup>                                   | 22.2              | <i>n</i> -octane                      | ~124/batch    |
| Activated Carbon loaded Na,<br>Co, Ag or Cu <sup>12</sup>       | 65-115            | <i>n</i> -hexane                      | 178/batch     |
| MC-Z(Cu, Co or Fe) <sup>13</sup>                                | 51.4-75.5         | <i>n</i> -hexane                      | 178/batch     |
| PT-Ag-MASN <sup>14</sup>                                        | 15.0 <sup>c</sup> | <i>n</i> -decane                      | 500/batch     |
| HKUST-1 <sup>15</sup>                                           | 59.6, 49.5        | <i>n</i> -octane                      | 1000/batch    |
| HKUST-1@ $\gamma$ -Al <sub>2</sub> O <sub>3</sub> <sup>16</sup> | 76.1, 59.7        | <i>n</i> -octane                      | 1000/batch    |
| CYCU-3 This work                                                | 45.83             | <i>n</i> -octane                      | 1000/batch    |
| CYCU-3@Al <sub>2</sub> O <sub>3</sub> (5%) This work            | 50.81             | <i>n</i> -octane                      | 1000/batch    |
| CYCU-3@Al <sub>2</sub> O <sub>3</sub> (10%) This<br>work        | 55.74             | <i>n</i> -octane                      | 1000/batch    |
| CYCU-3@Al <sub>2</sub> O <sub>3</sub> (20%) This                | 62.3              | <i>n</i> -octane                      | 1000/batch    |

**Table S4** Comparison of the adsorptive denitrogenation capacities of different adsorbents in model oil system.

| Adsorbent                                   | Type of NCCs                | Q <sub>e</sub><br>(mg-NCC/g) | Conditions | Reported  |
|---------------------------------------------|-----------------------------|------------------------------|------------|-----------|
| Activated Carbon <sup>7, 17-19</sup>        | Quinoline,<br>indole        | -                            | 39.0       | --        |
| Cu-Y <sup>20</sup>                          | NCCs with<br>aromatic rings | -                            | 3.0        | --        |
| Silica-zirconia cogel <sup>21</sup>         | Mixed                       | -                            | 10.0       | --        |
| Alumina <sup>22</sup>                       | Quinoline,<br>indole        | -                            | 7.16       | --        |
| Uio-66-NH <sub>2</sub> <sup>23, 24</sup>    | IND                         | 312                          | -          | --        |
| Uio-66-SO <sub>3</sub> H <sup>23, 24</sup>  | IND                         | 239                          | -          | --        |
| MIL-101-ED <sup>25</sup>                    | IND                         | 336                          | -          | --        |
| Uio-66-COOH <sup>23, 24</sup>               | IND, PY                     | 130                          | -          | --        |
| NH <sub>2</sub> -Uio-66 <sup>23, 24</sup>   | indole                      | 312                          | 37.3       | --        |
| CYCU-3@Al <sub>2</sub> O <sub>3</sub> (20%) | indole                      | 201                          | 39         | This work |
|                                             | Quinoline                   | 372                          | 56         | This work |
|                                             | Acridine                    | 393                          | 63         | This work |

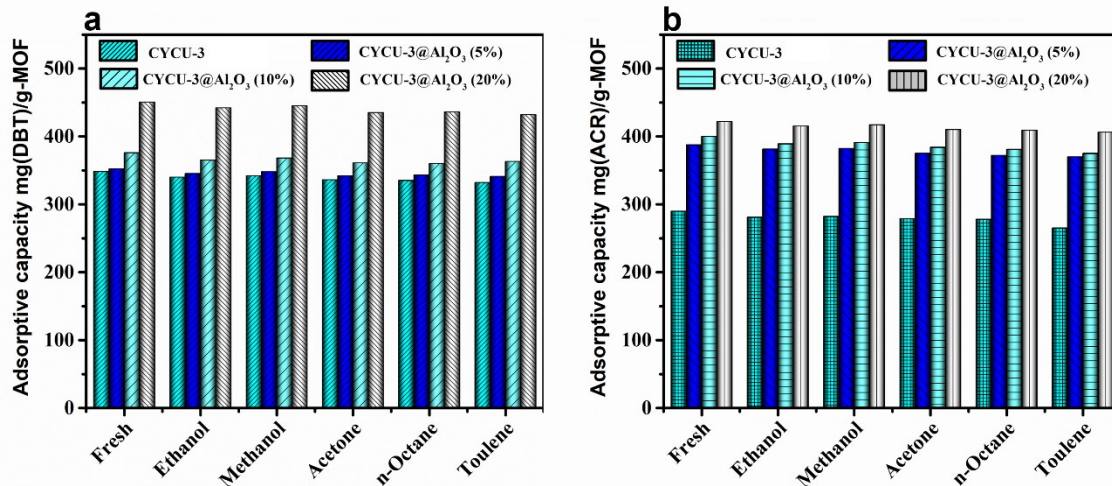

**Fig. S3** Effect of solvents applied in the regeneration of the CYCU-3 and CYCU-3@ $\gamma$ -Al<sub>2</sub>O<sub>3</sub> (5, 10 and 20%) composites on the adsorptive removal of DBT and ACR.

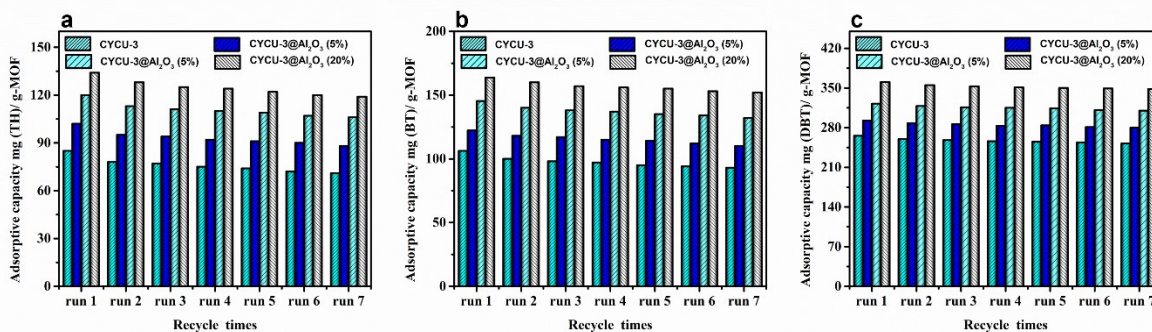

**Fig. S4** Effect of regeneration cycles on the performances of adsorptive removal of TH, BT and DBT over regenerated CYCU-3 and CYCU-3@ $\gamma$ -Al<sub>2</sub>O<sub>3</sub>(5, 10 and 20%) composites (by washing with methanol). The recyclability experiments were carried in individual solution system. For every 10 mL of model fuel, 0.1g of adsorbent was applied.

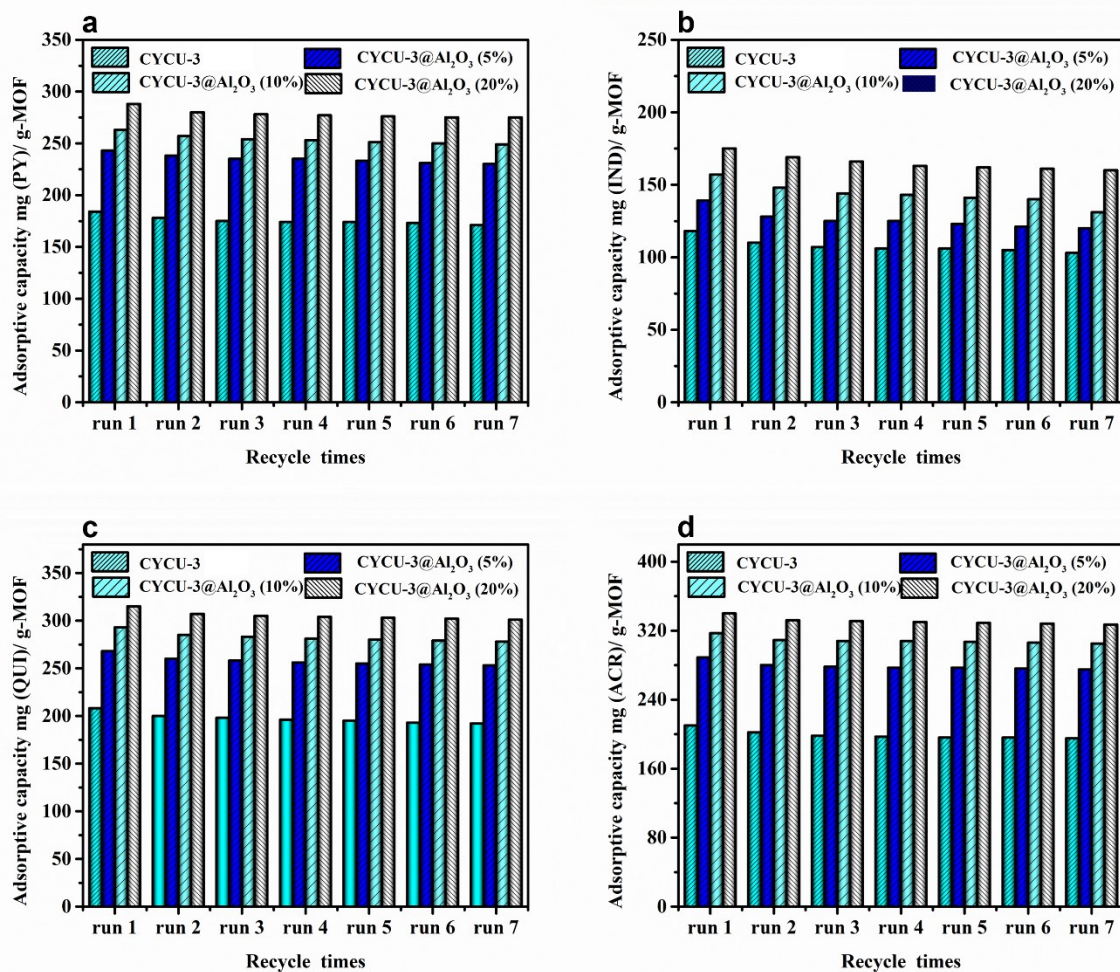

**Fig. S5** Effect of regeneration cycles on the performances of adsorptive removal of PY, IND, QUI and ACR over regenerated CYCU-3 and CYCU-3@ $\gamma$ -Al<sub>2</sub>O<sub>3</sub>(5, 10 and 20%) composites (washing with methanol). The recyclability experiments were conducted in individual solution system. For every 10 mL of model fuel, 0.1 g of adsorbent was applied.

## References

1. K. A. Cychoz, A. G. Wong-Foy and A. J. Matzger, *J. Am. Chem. Soc.*, 2009, **131**, 14538-14543.
2. M. Bagheri, M. Y. Masoomi and A. Morsali, *J. Hazard. Mater.*, 2017, **331**, 142-149.
3. Y. Shi, X. Zhang, L. Wang and G. Liu, *Alche. J.*, 2014, **60**, 2747-2751.
4. R.-H. Shi, Z.-R. Zhang, H.-L. Fan, T. Zhen, S. Ju and J. Mi, *Appl. Surf. Sci.*, 2017, **394**, 394-402.
5. A. Srivastav and V. C. Srivastava, *J. Hazard. Mater.*, 2009, **170**, 1133-1140.
6. E. Ghasemi, E. Alimardani, E. Shams and G. A. Koochmarch, *J. Electroanal. Chem.*, 2017, **789**, 92-99.
7. S. Haji and C. Erkey, *Ind. Eng. Chem. Res.*, 2003, **42**, 6933-6937.
8. Y. Shi, X. Zhang and G. Liu, *Fuel*, 2015, **158**, 565-571.
9. J. Qi, J. Li, Y. Li, X. Fang, X. Sun, J. Shen, W. Han and L. Wang, *Chem. Eng. J.*, 2017, **307**, 989-998.
10. H. Song, Y. Chang and H. Song, *Adsorption*, 2016, **22**, 139-150.
11. H. Song, G. Yang, H. Song, X. Cui, F. Li and D. Yuan, *J. Taiwan. Inst. Chem. E.*, 2016, **63**, 125-132.
12. C. O. Ania and T. J. Bandoz, *Carbon*, 2006, **44**, 2404-2412.
13. Z. X. Jiang, Y. Liu, X. P. Sun, F. P. Tian, F. X. Sun, C. H. Liang, W. S. You, C. R. Han and C. Li, *Langumir*,

- 2003, **19**, 731-736.
14. P. Tan, X.-Y. Xie, X.-Q. Liu, T. Pan, C. Gu, P.-F. Chen, J.-Y. Zhou, Y. Pan and L.-B. Sun, *J. Hazard. Mater.*, 2017, **321**, 344-352.
  15. L. Qin, Y. Zheng, D. Li, Y. Zhou, L. Zhang and Z. Zuhra, *Fuel*, 2016, **181**, 827-835.
  16. L. Qin, Y. Zhou, D. Li, L. Zhang, Z. Zhao, Z. Zuhra and C. Mu, *Ind. Eng. Chem. Res.*, 2016, **55**, 7249-7258.
  17. B. K. Jung and S. H. Jhung, *Fuel*, 2015, **145**, 249-255.
  18. N. A. Khan, Z. Hasan, K. S. Min, S.-M. Paek and S. H. Jhung, *Fuel. Process. Technol.*, 2013, **116**, 265-270.
  19. X. Han, H. Lin and Y. Zheng, *Can. J. Chem. Eng.*, 2015, **93**, 538-548.
  20. A. J. Hernandez-Maldonado and R. T. Yang, *Alche. J.*, 2004, **50**, 791-801.
  21. Y. S. Bae, M. B. Kim, H. J. Lee, C. H. Lee and J. W. Ryu, *Alche. J.*, 2006, **52**, 510-521.
  22. H. Zhang, G. Shan, H. Liu and J. Xing, *Surf. Coat. Tech.*, 2007, **201**, 6917-6921.
  23. I. Ahmed, N. A. Khan and S. H. Jhung, *Chem. Eng. J.*, 2017, **321**, 40-47.
  24. M. Sarker, H. J. An and S. H. Jhung, *J. Phys. Chem. C.*, 2018, **122**, 4532-4539.
  25. P. W. Seo, I. Ahmed and S. H. Jhung, *Phys. Chem. Chem. Phys.*, 2016, **18**, 14787-14794.
